# Supplementary material
Source: Springer Nature journal article supplement (https://www.springermedizin.de/resource/supplementary/12958_2008_484_MOESM4_ESM.pdf/9568056)

**D1****D4****D5i-I****D5I****D6i-I****D6I****D7i-I****D7I****D7e****A**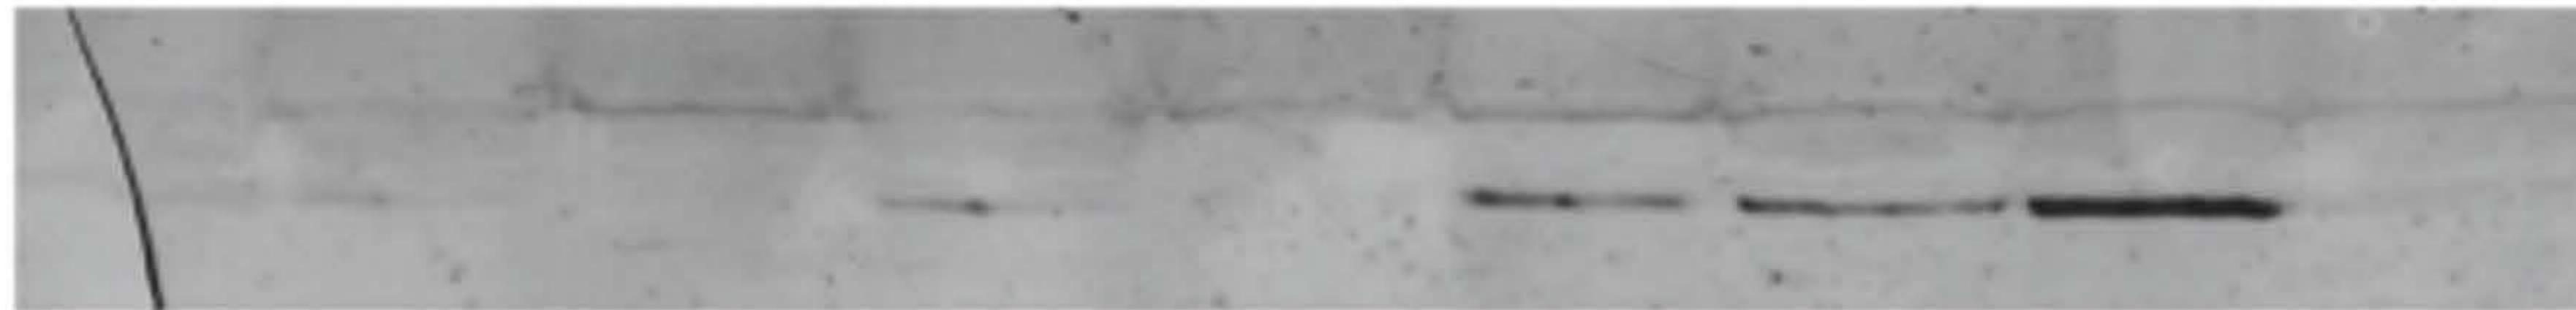**Sec63****B**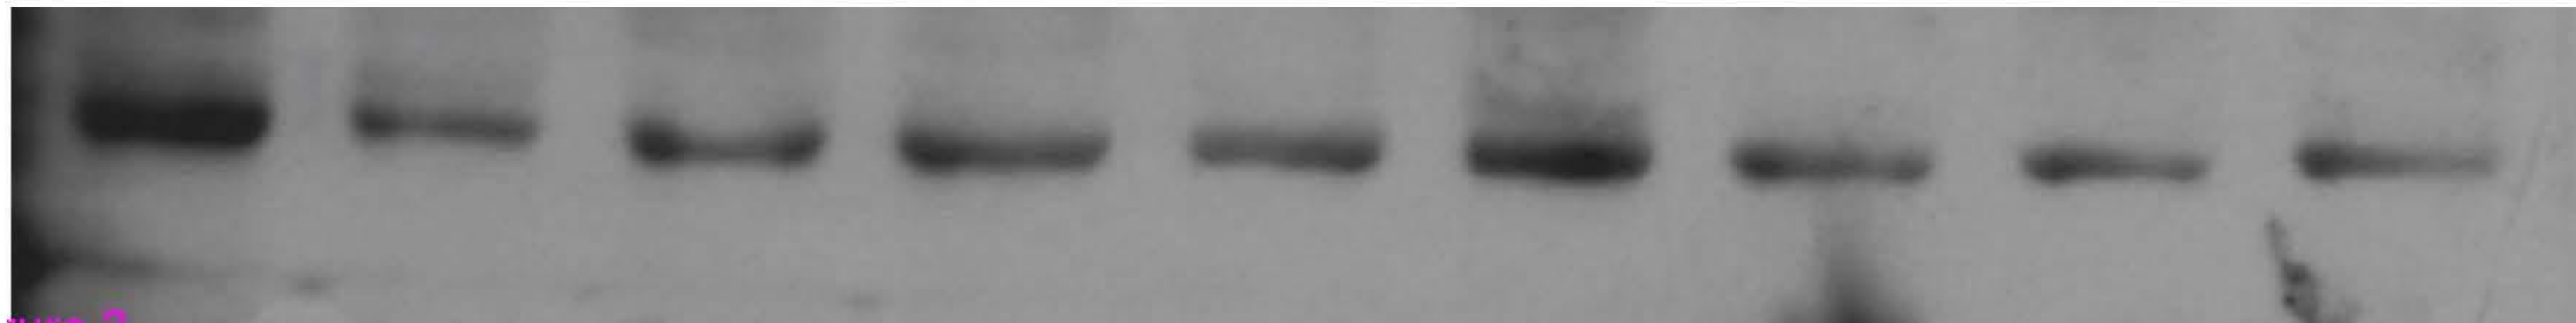 **$\beta$ -actin**

Supplement: MOESM4 [file 9568056]
